# Supplementary material for: A Systems Biology Approach Uncovers Cellular Strategies Used by Methylobacterium extorquens AM1 During the Switch from Multi- to Single-Carbon Growth
Source: PLoS One. 2010 Nov 24;5(11):e14091. doi: 10.1371/journal.pone.0014091 (PMC2991311; doi:10.1371/journal.pone.0014091)
Supplement: Supplementary Table S2 — Gene expression data for central metabolic pathways during the transition from succinate to methanol growth. (0.40 MB XLS) [file pone.0014091.s003.xls]

## Sheet: Sheet1
Time point arrays: Set 1 is the average of two technical duplicates (dye swap), Set 2 is a second biological replicate and the average of two technical duplicates (dye swap).
The Carbon Starvation arrays are the average of two technical duplicates (dye swap) where cells were transferred from the chemostat to a flask and incubated without carbon for 30 min.
LogPval is the log of the p-value.
Adj columns: Adj stands for adjusted. A time zero sample was used for comparison to all time points and was harvested directly from the chemostat before methanol addition. To control for expression changes that occurred due to flask transfer before methanol addition, a time zero chemostat sample was compared to a time zero flask transfer sample (cells transferred to a flask and then harvested). T…
MAGE desination colums refer to the published gene designations (Vuilleumier et al, 2009) for Methylobacterium extorquens AM1 publically available on the MaGe website: https://www.genoscope.cns.fr/agc/microscope/about/collabprojects.php?P_id=26 MaGe designations highlighted in pink indicate that the gene is found on a plasmid, higlighted in blue that the gene is found on chromosome 2/the mega-pla…
RMQ2002 and RMQ2007 gene designations (from ERGO-not public) are included for comparison to past publications where RMQ designations were presented
Inv fold change stands for inverse fold change
										0 min flask vs 0 min chemostat											10 min flask vs 0 min chemostat											30 min flask vs 0 min chemostat											60 min flask vs 0 min chemostat
Pathway	RMQ2002	RMQ2007	MaGe Designation	Gene Designation	Protein Designation	Protein Function	Reaction	EC#	SET1:	T=0 LogRatio	AdjT=0 LogRatio	T=0 PvalLog	T=0 gProcessed	T=0 rProcessed	T=0 gMean	T=0 rMean	T=0 Fold	AdjT=0 Fold	T=0 Inv Fold	AdjT=0 Inv Fold	T=10 LogRatio	AdjT=10 LogRatio	T=10 Log Pval	T=10 gProcessed	T=10 rProcessed	T=10 gMean	T=10 rMean	T=10 Fold Change	AdjT=10 Fold Change	T=10 Inv Fold Change	AdjT=10 Inv Fold Change	T=30 LogRatio	AdjT=30 LogRatio	T=30 LogPVal	T=30 gProcessed	T=30 rProcessed	T=30 gMean	T=30 rMean	T=30 Fold Change	AdjT=30 Fold Change	T=30 Inv Fold Change	AdjT=30 Inv Fold Change	T=60 LogRatio	AdjT=60 LogRatio	T=60 LogPVal	T=60 gProcessed	T=60 rProcessed	T=60 gMean	T=60 rMean
Methanol Oxidation									Adj=adjusted
	5966		META1_4538	mxaF	MEDH	Methanol dehydrogenase, large subunit	an oxidized cytochrome c + methanol <=> a reduced cytochrome c + formaldehyde	1.1.99.8		0.27859	0	-6.78833	54112.8	102954	19100.4	24699.3	1.89928	1	0.526515	1	0.271873	-0.00671706	-6.54743	122359	228996	82113.9	52662.3	1.8702	0.984652	0.534739	1.01559	0.0137523	-0.264837	-0.164264	93700	96902.5	22196.5	26577.6	1.03217	0.543454	0.968831	1.84008	0.17465	-0.103939	-3.2806	117992	176207	41896.8	47161.3
	5964		META1_4535	mxaI	MEDH	Methanol dehydrogenase, small subunit	an oxidized cytochrome c + methanol <=> a reduced cytochrome c + formaldehyde	1.1.99.8		0.256233	0	-5.97033	122778	221993	42989.4	53718.1	1.80529	1	0.554728	1	0.187496	-0.0687369	-3.63173	141527	218106	91817.8	50965.1	1.54	0.853617	0.649424	1.17149	-0.0367688	-0.293002	-0.655762	188301	174037	44189.3	45009.7	0.918833	0.509329	1.08836	1.96337	0.0875125	-0.168721	-1.11902	147687	180673	51974.3	48334.4
	5965		META1_4536	mxaG	MEDH	Cytochrome C	cytochrome C for methanol dehydrogenase reaction	None		0.0297082	0	-0.321518	100825	107924	34148.7	26759	1.071	1	0.934058	1	-0.279522	-0.30923	-6.83032	130791	68619.8	82013.8	16183	0.525385	0.490648	1.90337	2.03812	-0.419394	-0.449102	-12.3275	142914	54371.8	33353.5	14724.8	0.38075	0.355548	2.62681	2.81256	-0.172267	-0.201975	-3.17364	129876	87264	45288.7	23420.4
	44		META1_4537	mxaJ	MxaJ	Unknown				0.0707017	0	-0.863992	42003.6	49487.9	14396.2	12129.3	1.17697	1	0.84989	1	0.0294353	-0.0412664	-0.285999	47102	50580.3	31281.5	11572.2	1.07014	0.909355	0.934479	1.09968	-0.159611	-0.230313	-3.01694	55613.8	38801	13419	9573.73	0.692491	0.588419	1.44423	1.69947	-0.0546574	-0.125359	-0.659187	43030	37987.2	15168.6	9940.01
	4256		META1_4534	mxaR	MxaR	Unknown				0.0357124	0	-0.452955	24330.8	26473	8417.58	6695.13	1.08572	1	0.921068	1	-0.303248	-0.33896	-7.76422	22801	11333.2	15339.7	2733.89	0.497454	0.458184	2.01024	2.18253	-0.293221	-0.328934	-7.34451	33225.3	16934	8220.04	4227.9	0.509099	0.468885	1.96447	2.13272	-0.068603	-0.104315	-0.857776	24008	20454.4	8663.26	5460.71
	4144		META1_4533	mxaS	MxaS	Unknown				0.00663042	0	-0.166027	33924.6	34492.3	11644.2	8685.73	1.01539	1	0.984855	1	-0.0364744	-0.0431049	-0.368432	45136.9	41455.4	29848.3	9732.6	0.919461	0.905514	1.08763	1.10435	-0.171638	-0.178268	-3.14905	43367.6	29182.2	10824.1	7337.45	0.673543	0.663333	1.48471	1.50754	-0.049435	-0.0560654	-0.543916	47000.4	41829.8	16911.5	11046
	5266	RMQ16194	META1_4532	mxaA	MxaA	Essential for Ca2+ insertion into MDH				0.018692	0	-1.16046	1238.92	1280.06	474.325	387.855	1.04421	1	0.958088	1	-0.37593	-0.394622	-7.88239	1291.61	537.339	928.039	185.597	0.420825	0.403068	2.37663	2.48097	-0.258702	-0.277394	-4.49339	1757.82	958.471	495.023	286.769	0.55168	0.527966	1.8159	1.89406	-0.0443428	-0.0630348	-0.817543	1345.39	1203.68	512.845	385.296
	12328		META1_4531	mxaC	MxaC	Essential for Ca2+ insertion into MDH				0.0501312	0	-0.996449	2936.3	3302.93	1058.61	899.851	1.12236	1	0.890982	1	-0.433825	-0.483956	-11.9162	2993.52	1093.95	2099.83	322.131	0.368291	0.328129	2.71544	3.04759	-0.344284	-0.394415	-8.60016	3957.47	1778.72	1049.87	485.885	0.452602	0.40326	2.20945	2.47979	-0.0681905	-0.118322	-1.12905	2904.36	2470.89	1068.32	732.833
	12329		META1_4530	mxaK	MxaK	Essential for Ca2+ insertion into MDH				0.0754405	0	-1.01055	2545.51	3028.92	920.835	820.473	1.19007	1	0.840795	1	-0.419642	-0.495082	-11.292	2775.59	1052.35	1896.1	311.775	0.380528	0.319829	2.62827	3.12667	-0.387329	-0.46277	-10.0745	3768.74	1543.82	983.187	430.743	0.409893	0.344533	2.43966	2.90248	-0.0764566	-0.151897	-0.951594	2806.95	2351.61	1021.9	690.847
	5267		META1_4529	mxaL	MxaL	Essential for Ca2+ insertion into MDH				-0.00925413	0	-0.149971	5555.45	5448.06	1942.05	1410.61	0.978969	1	1.02159	1	-0.301523	-0.292269	-7.48193	5325.05	2648.78	3548.44	683.927	0.499626	0.510189	2.00305	1.96006	-0.328456	-0.319202	-8.47569	6767.53	3144.05	1781.73	797.724	0.46956	0.47951	2.1311	2.08546	-0.157745	-0.148491	-2.76634	5943.22	4125.79	2130.68	1148.75
	5268	RMQ16195	META1_4528	mxaD	MxaD	Essential for Ca2+ insertion into MDH				0.131716	0	-2.18322	16473.7	22297.7	5609.75	5474.3	1.35432	1	0.738395	1	-0.049202	-0.180917	-0.58402	17187	15369.5	11052.5	3594.74	0.892934	0.659299	1.12001	1.51676	-0.376117	-0.507833	-10.5824	22915.1	9635.96	5620.96	2389.24	0.420615	0.310576	2.37749	3.21983	0.0221822	-0.109533	-0.553923	17485.9	18361.8	6145.48	4828.72
	12330		META1_4527	mxaE	MxaE	Unknown				0.0890731	0	-1.18211	4286.22	5263.1	1512.63	1367.71	1.22765	1	0.814568	1	-0.202456	-0.291529	-4.02681	4222.46	2638.83	2889.4	684.638	0.6274	0.511059	1.59388	1.95672	-0.419267	-0.50834	-11.8296	5892.39	2243.78	1506.57	600.973	0.380839	0.310213	2.62588	3.22359	-0.0180855	-0.107159	-0.160018	4132.08	3959.39	1490.96	1108.65
	4612		META1_4526	mxaH	MxaH	Unknown				-0.0389043	0	-0.574483	2795.5	2561.05	979.336	683.865	0.914319	1	1.09372	1	-0.221225	-0.182321	-4.43052	2836.89	1715.51	1871.5	452.251	0.600866	0.657172	1.66428	1.52167	-0.467284	-0.42838	-12.9455	3608.62	1237.13	939.051	338.698	0.34097	0.372924	2.93282	2.68151	-0.14419	-0.105285	-2.47962	2809.65	2028.88	1014.16	582.527
C1 Transfer-H4MPT linked
	9682		META1_1766	fae	FAE	Formaldehyde activating enzyme	formaldehyde + tetrahydromethanopterin -> 5,10-methylene-tetrahydromethanopterin + H2O	None		0.0792174	0	-0.989772	87430.3	104978	30015.3	26444.1	1.2001	1	0.833264	1	0.15388	0.0746629	-2.65822	108826	155280	72547.9	36236.3	1.42542	1.18758	0.701749	0.842049	0.0934348	0.0142174	-1.2486	116798	144123	28397.4	38264.9	1.24021	1.03328	0.806542	0.967793	0.253027	0.173809	-5.89264	110174	195951	39400.4	51137.2
	5675		META1_1761	mtdB	MtdB	Methylene-H4MPT DH	5,10-methylene-tetrahydromethanopterin + NAD(P)+ = 5,10-methenyltetrahydromethanopterin + NAD(P)H	1.5.1.-		0.00112389	0	-0.0345099	1822.1	1826.16	651.566	520.981	1.00265	1	0.997475	1	0.268183	0.26706	-6.0544	1767.61	3278.28	1175.08	836.886	1.85432	1.84952	0.539284	0.54068	0.385567	0.384443	-10.5848	2600.02	6326.83	683.202	1565.76	2.42978	2.4235	0.411561	0.412627	0.355017	0.353893	-9.6827	1652.7	3746.63	616.848	1055.71
	3311		META1_1728	mtdA	MtdA	Methylene-H4MPT/Methylene-H4F DH	5,10-methylene-tetrahydromethanopterin + NADP+ = 5,10-methenyltetrahydromethanopterin + NADPH , 5,10-methylene-THF + NADP+ = NADPH + 5,10-methenyltetrahydrofolate	1.5.1.-, 1.5.1.5		0.0566253	0	-0.677183	4939.13	5641.76	1709.88	1436.26	1.13954	1	0.877972	1	0.667497	0.610871	-21.0012	4545.64	21234.2	2993.67	4991.85	4.65068	4.08199	0.215042	0.244979	1.07369	1.01707	-29.3545	6744.37	80501.8	1704.49	19302.6	11.8495	10.4009	0.0843937	0.0961459	1.21463	1.158	-30.9708	4721.28	77716.4	1742.77	19865.9
	5670		META1_1763	mch	MCH	Methenyl-H4MPT cycrohydrolase	5,10-methylene-tetrahydromethanopterin + H2O = 5-formyl-tetrahydromethanopterin + H+	3.5.4.27		0.00807291	0	-0.0699057	9339.47	9525.19	3219.44	2405.69	1.01878	1	0.981603	1	-0.335465	-0.343537	-8.91651	9613.9	4424.56	6348.4	1104.77	0.461971	0.45338	2.16543	2.20565	-0.0763899	-0.0844628	-0.95675	12230.9	10267.9	3080.52	2514.53	0.838711	0.82326	1.19232	1.21468	0.0791955	0.0711226	-0.977081	9830.47	11855.9	3525.42	3130.19
	777		META1_1757	fhcA	FhcA	Formyltransferase/hydrolase complex, a subunit	5-formyl-tetrahydromethanopterin + "MFR" (methanofuran-like co-factor) = formyl-"MFR" + tetrahydromethanopterin, formyl-"MFR" + H2O = formate + "MFR"	None		0.00792118	0	-0.368638	1518.08	1541.66	563.939	448.635	1.01841	1	0.981931	1	-0.163153	-0.171075	-2.62088	1595.87	1082.9	1152.35	313.106	0.686971	0.674412	1.45628	1.48277	-0.0738666	-0.0817877	-0.826279	2072.38	1741.06	568.446	481.635	0.843603	0.828347	1.18542	1.20722	0.0290874	0.0211662	-0.584203	1745.73	1851.88	657.414	559.226
	778 (alternate probe-center probe has design error)		META1_1758	fhcB*	FhcB	Formyltransferase/hydrolase complex, b subunit	5-formyl-tetrahydromethanopterin + "MFR" (methanofuran-like co-factor) = formyl-"MFR" + tetrahydromethanopterin, formyl-"MFR" + H2O = formate + "MFR"	None		-0.0480064	0	-0.608275	6292.44	5624.09	2222.06	1456.39	0.895359	1	1.11689	1	-0.269876	-0.221869	-6.41951	6984.53	3731.99	4806.05	946.338	0.537213	0.599972	1.86165	1.66675	-0.0763704	-0.0283641	-1.10155	7887.72	6555.38	2084.23	1635.99	0.838821	0.936776	1.19237	1.06749	-0.0523856	-0.00437923	-0.666694	6989.84	6183.11	2503.83	1721.8
	8759		META1_1755	fhcC	FhcC	Formyltransferase/hydrolase complex, g subunit	5-formyl-tetrahydromethanopterin + "MFR" (methanofuran-like co-factor) = formyl-"MFR" + tetrahydromethanopterin, formyl-"MFR" + H2O = formate + "MFR"	None		0.104207	0	-1.46727	6463.6	8184.92	2315.05	2032.18	1.27122	1	0.786694	1	0.00309208	-0.101115	-0.308857	7830.98	7809.99	5536.33	1884.82	1.00715	0.792291	0.992906	1.26216	0.030438	-0.0737695	-0.47709	7439.17	7953.26	1936.33	2000.85	1.0726	0.843782	0.932316	1.18514	0.0981482	-0.00605929	-1.37175	8797.88	10967.8	3202.33	2906.2
	8757		META1_1756	fhcD	FhcD	Formyltransferase/hydrolase complex, d subunit	5-formyl-tetrahydromethanopterin + "MFR" (methanofuran-like co-factor) = formyl-"MFR" + tetrahydromethanopterin, formyl-"MFR" + H2O = formate + "MFR"	None		-0.0244489	0	-0.189395	906.987	857.834	349.682	276.938	0.94526	1	1.05791	1	-0.302443	-0.277994	-4.11772	834.757	418.77	588.611	153.512	0.498803	0.527238	2.00823	1.89668	-0.098257	-0.0738081	-0.885225	1028.02	819.652	305.007	244.096	0.797575	0.843707	1.25397	1.18524	-0.0076238	0.0168251	-0.132195	813.09	799.138	325.218	273.356
C1 Transfer-H4F linked
	5969		META1_0329	ftfL	FtfL	Formyl-H4F ligase	ATP + formate + tetrahydrofolate <=> ADP + phosphate + 10-formyl-tetrahydrofolate + H+	6.3.4.3		0.116358	0	-1.72568	3647.77	4757.74	1262.27	1241.05	1.30729	1	0.764992	1	0.76763	0.651272	-23.6971	3376.52	19827.6	2199.35	4700.68	5.85643	4.47994	0.170755	0.223217	0.854385	0.738028	-25.6227	4913.07	35452.6	1259.97	8300.61	7.15184	5.47051	0.139845	0.182798	0.924571	0.808213	-27.0828	3379.99	28468.7	1230.68	7461.99
	6990		META1_1729	fch	FCH	Methenyl-H4F cyclohydrolase	10-formyl-tetrahydrofolate + H+ = 5,10-methenyltetrahydrofolate + H2O	3.5.4.9		0.0639432	0	-0.865504	1076.68	1250.78	403.239	366.727	1.15865	1	0.863109	1	0.712039	0.648095	-21.5842	1058.21	5499.35	702.215	1329.6	5.15385	4.44729	0.194113	0.224856	1.25842	1.19448	-31.2668	1455.94	26678.7	409.126	6225.7	18.143	15.6487	0.0551908	0.0639032	1.3336	1.26966	-31.9277	1075.47	23158.5	418.506	6129.51
	3311		META1_1728	mtdA	MtdA	Methylene-H4MPT/Methylene-H4F DH	5,10-methylene-tetrahydromethanopterin + NADP+ = 5,10-methenyltetrahydromethanopterin + NADPH , NADPH + 5,10-methenyltetrahydrofolate = 5,10-methylene-THF + NADP+	1.5.1.-, 1.5.1.5		0.0566253	0	-0.677183	4939.13	5641.76	1709.88	1436.26	1.13954	1	0.877972	1	0.667497	0.610871	-21.0012	4545.64	21234.2	2993.67	4991.85	4.65068	4.08199	0.215042	0.244979	1.07369	1.01707	-29.3545	6744.37	80501.8	1704.49	19302.6	11.8495	10.4009	0.0843937	0.0961459	1.21463	1.158	-30.9708	4721.28	77716.4	1742.77	19865.9
Formate Oxidation
	7912		META1_5032	fdh1A	FDH1	Tungsten-dependent formate DH, a subunit	formate + NAD+ <=> CO2 + NADH , formate[periplasmic space] + MQ + 2 H+ -> CO2[periplasmic space] + MQH2 + H+[periplasmic space]	1.2.1.2		-0.203903	0	-4.1999	4445.59	2780.8	1535.74	736.491	0.625363	1	1.59933	1	0.791344	0.995247	-24.2854	4702.96	29172.8	3040.84	6805.78	6.18506	9.89115	0.16168	0.1011	0.735117	0.93902	-22.8986	5328.72	29118.9	1410.36	6761.48	5.43402	8.69	0.18403	0.115075	0.728088	0.931992	-22.6778	4510.42	24178.4	1616.68	6288.74
	7911		META1_5031	fdh1B	FDH1	Tungsten-dependent formate DH, b subunit	formate + NAD+ <=> CO2 + NADH , formate[periplasmic space] + MQ + 2 H+ -> CO2[periplasmic space] + MQH2 + H+[periplasmic space]	1.2.1.2		-0.211487	0	-4.27307	2767.44	1697.57	968.594	483.922	0.614508	1	1.62742	1	0.781455	0.992942	-24.0399	2934.8	17755.3	1918.9	4266.15	6.04583	9.8388	0.165404	0.101638	0.617361	0.828848	-19.3644	3554.16	14730.4	940.276	3610.53	4.14347	6.74292	0.241347	0.148304	0.694401	0.905888	-21.8294	3110.56	15419.9	1138.27	4104.87
	12669		META1_4848	fdh2A	FDH2	Molybdenum-dependent formate DH	formate + NAD+ <=> CO2 + NADH , formate[periplasmic space] + MQ + 2 H+ -> CO2[periplasmic space] + MQH2 + H+[periplasmic space]	1.2.1.2		0.390714	0	-6.64342	249.892	611.596	133.177	212.832	2.46019	1	0.406951	1	1.96463	1.57392	-34.3516	333.57	30769.7	252.901	7258.19	92.1872	37.4901	0.0108495	0.0266737	2.14656	1.75584	-34.6273	496.014	69479.2	174.998	16625.4	140.216	56.9956	0.00713981	0.0175452	2.0928	1.70209	-34.5734	452.362	55879.5	212.022	14819
	12670 (alternate probe-center probe has design error)		META1_4847	fdh2B*	FDH2	Molybdenum-dependent formate DH, b subunit	formate + NAD+ <=> CO2 + NADH , formate[periplasmic space] + MQ + 2 H+ -> CO2[periplasmic space] + MQH2 + H+[periplasmic space]	1.2.1.2		0.270348	0	-2.26165	162.481	303.487	103.482	135.483	1.86728	1	0.537665	1	1.76182	1.49147	-33.7381	217.236	12608.7	176.687	3036.68	58.1836	31.0077	0.0174247	0.0322501	2.11651	1.84616	-34.5401	230.654	30178.4	107.267	7203.27	130.991	70.1721	0.00765977	0.0142507	1.84441	1.57406	-34.1309	277.18	19453.1	146.945	5317.25
	4236		META1_4846	fdh2C	FDH2	Molybdenum-dependent formate DH, g subunit	formate + NAD+ <=> CO2 + NADH , formate[periplasmic space] + MQ + 2 H+ -> CO2[periplasmic space] + MQH2 + H+[periplasmic space]	1.2.1.2		0.0729006	0	-0.804805	690.708	810.308	285.658	259.697	1.18278	1	0.845477	1	1.629	1.55609	-33.4832	902.623	37869.2	665.557	9025.52	42.7178	35.9828	0.023584	0.0277911	1.77287	1.69997	-33.952	867.238	51502.1	267.374	12267	59.3887	50.1149	0.0169032	0.0199541	1.51195	1.43905	-33.0035	1033.19	33179.6	419.334	8823.86
	MELfdh2d	16139	META1_4849	fdh2D	FDH2	Molybdenum-dependent formate DH, d subunit	formate + NAD+ <=> CO2 + NADH , formate[periplasmic space] + MQ + 2 H+ -> CO2[periplasmic space] + MQH2 + H+[periplasmic space]	1.2.1.2		0.382314	0	-3.92089	147.224	354.615	99.6079	147.03	2.43191	1	0.418138	1	1.73316	1.35085	-33.5062	181.651	9706.68	158.17	2326.31	54.2909	22.431	0.0185525	0.0445812	2.13448	1.75217	-34.557	209.661	28616.5	101.603	6851.97	136.305	56.5159	0.0073374	0.0176941	2.04762	1.6653	-34.5027	186.798	20910.7	116.746	5637.98
	8958		META1_0303	fdh3A	FDH3	Cytochrome-linked formate DH	a ferricytochrome b1 + formate = a ferrocytochrome b1 + CO2 (Formate dehydrogenase (cytochrome))	1.2.2.1		-0.374059	0	-10.1126	2448	1022.88	833.086	313.544	0.42265	1	2.36646	1	-0.273105	0.100954	-5.92434	2280.79	1224.4	1449.62	341.901	0.533307	1.26169	1.87581	0.792586	0.361849	0.735908	-9.77052	3067.98	7133.33	801.662	1703.54	2.30092	5.44387	0.434714	0.183693	0.267188	0.641247	-6.44177	2218.41	4103.93	805.259	1126.88
	3495	15988	META1_0304	fdh3B	FDH3	Cytochrome-linked formate DH, b subunit-Fe-S cluster subunit	a ferricytochrome b1 (ox) + formate = a ferrocytochrome b1 (red) + CO2 (Formate dehydrogenase (cytochrome))	1.2.2.1		-0.358588	0	-4.31877	389.149	171.217	175.071	98.8255	0.439119	1	2.2896	1	-0.348073	0.0105156	-2.21593	401.232	180.871	277.794	104.942	0.449601	1.02451	2.23343	0.976078	0.362587	0.721175	-5.70722	514.934	1178.57	170.376	341.273	2.30456	5.26229	0.433924	0.190031	0.272719	0.631308	-5.3775	392.903	732.698	178.127	256.83
	3496	3495	META1_0305	fdh3C	FDH3	Cytochrome-linked formate DH	a ferricytochrome b1 + formate = a ferrocytochrome b1 + CO2 (Formate dehydrogenase (cytochrome))	1.2.2.1		-0.144582	0	-2.48148	2169.93	1549.08	757.003	445.05	0.716842	1	1.39504	1	-0.153715	-0.0091332	-2.43371	1984.04	1399.07	1291.82	383.309	0.701926	0.97919	1.42469	1.02125	0.36332	0.507902	-9.71755	2715.09	6273.09	701.507	1533.95	2.30851	3.22034	0.433203	0.310526	0.280858	0.42544	-6.882	2026.81	3879.87	743.735	1074.39
	8549		META1_2094	fdh4A1	FDH4	formate dehydrogenase	formate + oxidized acceptor (AC) = CO2 + reduced acceptor (ACH)	Unknown		-0.383173	0	-5.88704	525.443	217.369	223.759	110.943	0.413835	1	2.41642	1	0.844823	1.228	-23.914	508.241	3555.43	366.203	896.119	6.99556	16.9042	0.142948	0.0591568	0.922104	1.30528	-25.6529	631.126	5271.99	205.076	1314.3	8.35802	20.1965	0.119646	0.0495135	0.955118	1.33829	-27.471	560.333	5052.6	241.685	1445.45
	8550	8549	META1_2094	fdh4A2	FDH4	formate dehydrogenase	formate + oxidized acceptor (AC) = CO2 + reduced acceptor (ACH)	Unknown		-0.678012	0	-16.7318	1010.95	212.535	382.483	109.836	0.209888	1	4.76444	1	0.423153	1.10117	-10.9892	896.21	2364.96	632.031	621.918	2.64944	12.6231	0.377439	0.0792199	0.590252	1.26826	-17.5647	1272.5	4930.69	372.033	1257.17	3.89271	18.5466	0.256891	0.0539183	0.702635	1.38065	-21.8947	1002.3	5033.66	399.611	1430.98
PQQ Biosynthesis
	15762		META1_1751	pqqA	PqqA	PQQ synthesis				0.241054	0	-5.52632	138393	243444	48387.5	57713.2	1.74202	1	0.574046	1	0.287258	0.0462043	-7.39777	144055	287237	92474	63492.7	1.93757	1.11225	0.51611	0.899075	0.0972481	-0.143805	-3.70458	200290	272312	47369.8	61283.5	1.25097	0.718116	0.799377	1.39253	0.252134	0.0110803	-6.2608	144606	272319	51374.5	64958.7
	8765		META1_1750	pqqB	PqqB	PQQ synthesis				-0.0610263	0	-0.669564	6424.28	5578.79	2208.6	1439.04	0.868908	1	1.15087	1	-0.286379	-0.225353	-6.95818	5979.94	3090.85	3955.72	794.888	0.517155	0.595179	1.93365	1.68017	-0.219813	-0.158786	-4.62821	8291.54	5012.85	2130.82	1230.52	0.602819	0.693767	1.65887	1.44141	-0.0958481	-0.0348218	-1.29771	6070.82	4873.92	2151.83	1337.39
	8766		META1_1749	pqqC/D	PqqC/D	PQQ synthesis-fusion protein				0.054426	0	-0.585824	25707.5	29171.1	8849.06	7311.1	1.13351	1	0.882214	1	0.136682	0.0822565	-2.24525	33202	45528.1	21573	10819.1	1.36988	1.20853	0.729991	0.827453	0.26671	0.212284	-6.34578	33323.4	61744.5	8320.12	15288	1.84803	1.63036	0.541116	0.613361	0.256978	0.202552	-5.99494	37239.1	67071.8	13463.8	17460.3
	8767		META1_1748	pqqE	PqqE	PQQ synthesis				0.00601423	0	-0.191293	11501.5	11649.9	3937.66	2910.17	1.01394	1	0.986247	1	-0.235968	-0.241982	-5.24998	12620.1	7343.1	8125.98	1777.93	0.580807	0.57282	1.72174	1.74575	-0.0420888	-0.048103	-0.647859	15934.5	14515.9	3956.88	3519.41	0.907635	0.895152	1.10176	1.11713	0.0691937	0.0631795	-0.922585	12382.8	14571.1	4400.24	3801.16
	11864		META1_2330	pqqF	PqqF	PQQ synthesis				0.0270526	0	-0.241836	2436.39	2591.31	874.371	702.639	1.06427	1	0.93961	1	0.0611676	0.0341151	-0.649318	2690.44	3101.59	1807.58	791.929	1.15124	1.08172	0.868625	0.924453	-0.0082233	-0.0352759	-0.0598511	3290.65	3227.28	874.234	828.569	0.981243	0.921986	1.01912	1.08462	0.0596372	0.0325847	-0.643198	2744.7	3143.06	999.462	893.569
	7025		META1_3671	pqqG	PqqG	PQQ synthesis				-0.144922	0	-2.38924	5024.42	3600.05	1753.75	946.515	0.716272	1	1.39612	1	-0.271346	-0.126424	-6.34688	4839.02	2590.53	3212.88	672.948	0.53537	0.74744	1.86787	1.3379	-0.215728	-0.0708066	-4.43671	6061.15	3660.97	1601.67	924.788	0.608515	0.849559	1.64334	1.17708	-0.138145	0.00677678	-2.24346	4729.63	3439.1	1694.42	976.81
H4MPT Synthesis
	7614		META1_4312	dmrA	DmrA	Dihydromethanopterin reductase				-0.0708961	0	-0.729912	676.953	578.199	275.947	206.091	0.849384	1	1.17732	1	-0.27471	-0.203814	-3.7361	842.6	449.442	595.475	164.276	0.531239	0.62544	1.88239	1.59887	-0.167514	-0.0966181	-1.59341	992.483	679.027	293.261	227.885	0.679964	0.800538	1.47067	1.24916	-0.000981024	0.0699151	-0.221165	827.931	828.771	329.669	286.081
	9374		META1_3703	orf4	Orf4	Cofactor biosynthesis				0.0314183	0	-0.218058	504.777	544.299	221.908	190.987	1.07502	1	0.930212	1	0.278842	0.247423	-4.43305	518.259	992.96	379.356	284.758	1.90038	1.76776	0.526209	0.565688	0.118106	0.0866878	-0.944928	685.868	916.499	218.401	262.435	1.31252	1.22092	0.761893	0.819053	0.0165813	-0.0148369	-0.497497	549.425	582.374	234.659	209.024
	4203		META1_1764	orf5	Orf5	Cofactor biosynthesis				-0.0451249	0	-0.421969	1288.12	1159.54	482.923	349.059	0.901312	1	1.10949	1	-0.25453	-0.209405	-4.27531	1263.46	706.244	876.985	222.458	0.556506	0.61744	1.79693	1.61959	-0.198673	-0.153548	-3.05798	1611.61	1020.5	449.164	295.721	0.632888	0.702186	1.58006	1.42413	0.00718645	0.0523114	-0.0538209	1363.78	1385.55	517.955	427.622
	3407	15763	META1_1765	orf7	Orf7	Cofactor biosynthesis				-0.0191078	0	-0.360059	894.304	857.791	347.784	279.891	0.956957	1	1.04498	1	-0.419782	-0.400675	-6.78079	865.492	328.608	615.733	136.271	0.38038	0.397489	2.62895	2.51579	-0.252345	-0.233237	-3.93361	1327.69	742.504	371.349	233.922	0.559313	0.584471	1.78791	1.71095	0.0374991	0.0566068	-0.350948	922.927	1004.61	364.3	329.307
	9680		META1_1768	orf9	Orf9	Cofactor biosynthesis				-0.0370034	0	-0.360122	1223.67	1121.88	460.645	342.565	0.918325	1	1.08894	1	-0.169737	-0.132734	-2.76322	1593.75	1069.97	1121.84	311.478	0.676492	0.736659	1.47821	1.35748	-0.201357	-0.164353	-2.84858	1489.55	930.144	424.086	277.619	0.628989	0.684931	1.58985	1.46	-0.225095	-0.188092	-4.82853	1736.95	1030.61	646.988	340.244
	MELorf17	9680	META1_1767	orf17	Orf17	Cofactor biosynthesis				-0.0315274	0	-0.309495	1194.11	1109.12	448.673	340.6	0.929978	1	1.07529	1	-0.0747712	-0.0432438	-0.837759	1521.93	1279.09	1041.82	363.364	0.841838	0.905224	1.18788	1.1047	-0.0708974	-0.03937	-0.647744	1472.74	1255.91	412.419	369.038	0.849381	0.913335	1.17733	1.09489	-0.0505527	-0.0190253	-0.547883	2036.36	1809.7	750.919	547.96
	1238		META1_1773	orf19	Orf19	Cofactor biosynthesis				-0.0927652	0	-1.11177	643.563	521.872	261.98	187.567	0.807672	1	1.23813	1	-0.181005	-0.0882402	-1.48222	598.265	395.572	407.034	150.74	0.659166	0.816131	1.51707	1.22529	0.0982735	0.191039	-0.783328	808.584	1019.61	247.819	291.041	1.25393	1.55253	0.797492	0.644112	0.0715945	0.16436	-0.841597	608.948	722.279	253.757	248.599
	12882		META1_1774	orf20	Orf20	Cofactor biosynthesis				-0.136301	0	-1.22829	418.621	307.054	187.748	134.253	0.730633	1	1.36868	1	-0.549933	-0.413632	-3.71157	419.403	121.144	300.159	83.2959	0.281882	0.385805	3.54758	2.59198	-0.321789	-0.185488	-3.18465	529.359	252.925	175.484	109.027	0.476663	0.652397	2.09792	1.53281	-0.289679	-0.153379	-4.58277	426.444	217.833	190.812	115.806
	9678		META1_1775	orf21	Orf21	Cofactor biosynthesis				-0.131366	0	-1.8218	923.258	680.518	360.72	231.296	0.738983	1	1.35321	1	-0.606836	-0.47547	-12.6845	1214.78	301.333	842.003	129.283	0.247266	0.334603	4.04423	2.98862	-0.332241	-0.200875	-5.32555	1299.55	597.222	382.068	198.112	0.465328	0.629687	2.14902	1.58809	-0.289651	-0.158286	-6.73496	1284.69	657.36	486.769	237.988
	9677		META1_1776	orf22	Orf22	Cofactor biosynthesis				-0.0532952	0	-0.649755	720.326	635.369	293.971	221.923	0.884514	1	1.13056	1	-0.226074	-0.172778	-2.86583	703.982	416.629	511.065	160.249	0.594191	0.671771	1.68296	1.4886	-0.107723	-0.0544279	-0.855006	974.615	755.293	295.728	239.507	0.780328	0.88221	1.28151	1.13352	-0.0397224	0.0135728	-0.644833	700.885	634.071	290.941	231.337
	5674	13462	META1_1762	orfY	OrfY	Cofactor biosynthesis				-0.0691548	0	-0.775068	928.234	797.907	356.71	266.154	0.852796	1	1.17261	1	-0.285533	-0.216378	-4.52269	957.508	494.477	673.149	175.236	0.518164	0.607606	1.92989	1.6458	0.194104	0.263259	-3.37355	1303.12	2035.46	372.378	556.065	1.56352	1.83341	0.639582	0.545433	0.226802	0.295957	-4.79029	1072.58	1806.43	415.6	553.934
H4F Synthesis
	8770		META1_1743	folK	FolK	2-Amino-4-hydroxy-6-hydroxymethyl-7,8-dihydropterin pyrophosphokinase				0.0195727	0	-0.173567	994.695	1038.73	380.689	321.432	1.0461	1	0.955933	1	-0.324602	-0.344175	-5.26561	987.027	466.868	684.024	165.917	0.473585	0.452715	2.11156	2.2089	-0.279373	-0.298946	-4.92667	1441.69	758.774	401.298	229.363	0.525565	0.502405	1.90271	1.99043	-0.10875	-0.128323	-1.44048	1097.5	854.234	422.012	288.954
	8769		META1_1744	folB	FolB	Dihydroneopterin aldolase				0.0217351	0	-0.234396	3386.65	3562.42	1188.28	940.629	1.05132	1	0.951185	1	0.0895496	0.0678145	-1.26072	4608.35	5686.85	3022.33	1389.15	1.22899	1.169	0.813674	0.855432	0.125779	0.104044	-1.87737	4041.48	5399.67	1040.13	1361.53	1.33592	1.2707	0.74855	0.786966	0.0727947	0.0510596	-0.972523	4961.11	5887.14	1767.08	1585.56
	79		META1_1745	folP	FolP	Dihydropteroate synthase				-0.0230214	0	-0.191227	1762.91	1672.01	643.448	474.399	0.948372	1	1.05444	1	-0.238558	-0.215537	-4.76581	2258.11	1301.6	1534.38	363.203	0.577353	0.608784	1.73204	1.64262	-0.278056	-0.255035	-5.44771	2320.89	1225.11	623.812	360.708	0.527162	0.55586	1.89695	1.79902	-0.17451	-0.151488	-3.2209	2741.68	1830.09	1001.46	546.544
	8314		META1_2264	folE	FolE	GTP cyclohydrolase				-0.0582529	0	-0.6312	7739.67	6778.04	2681.27	1737.06	0.874474	1	1.14354	1	-0.178706	-0.120453	-3.32711	7527.42	4984.95	5015.36	1239.56	0.662665	0.757787	1.50906	1.31963	-0.207783	-0.14953	-4.28394	10949.4	6804.36	2771.11	1660.21	0.61975	0.708712	1.61355	1.41101	-0.0856032	-0.0273503	-1.07742	7538.15	6194.94	2654.07	1714.67
	7145		META1_4888	folC	FolC	Dihydrofolate synthase				0.0447608	0	-0.507362	4365.14	4819.7	1552.62	1251.84	1.10856	1	0.902068	1	-0.0562579	-0.101019	-0.602235	7344.01	6435.98	4840.76	1591.86	0.878501	0.792467	1.1383	1.26188	-0.35527	-0.400031	-9.39476	5803.85	2553.88	1484.06	668.199	0.441296	0.398079	2.26605	2.51207	-0.250486	-0.295247	-5.74564	8483.06	4747.48	3023.32	1303.47
	403	3015	META1_2853	dyr	DYR	Dihydrofolate reductase				0.0143003	0	-0.165017	1214.81	1256.34	448.894	375.561	1.03348	1	0.967609	1	0.0950478	0.0807475	-1.06006	1196.49	1487.43	821.973	409.783	1.24465	1.20434	0.803438	0.830333	-0.0238033	-0.0381036	-0.208107	1642.58	1553.31	452.796	425.543	0.946666	0.916002	1.05634	1.0917	-0.0155823	-0.0298826	-0.163142	1382.92	1335.82	517.226	418.566
Serine Cycle
	12876		META1_1732	ppc	PPC	PEP carboxylase	phosphate + oxaloacetate + H+ = phosphoenolpyruvate + CO2 + H2O	4.1.1.31		0.048039	0	-0.431252	697.598	778.456	278.79	256.976	1.1183	1	0.896354	1	0.820964	0.772925	-24.3935	876.267	5813.88	600.547	1428.95	6.62163	5.92823	0.151021	0.168684	1.48615	1.43811	-32.8327	1028.59	31492.5	307.142	7812.21	30.6304	27.4226	0.0326482	0.0364663	1.45081	1.40277	-32.6981	972.98	27431.1	391.848	7431.81
	4824		META1_2984	eno1	ENO	Enolase	2-phosphoglycerate = phosphoenolpyruvate + H2O	4.2.1.11		-0.0192401	0	-0.587716	6242.47	5959.23	2128.98	1508.89	0.956676	1	1.04531	1	-0.188879	-0.169639	-3.85517	6647.8	4331.29	4220.99	1069.12	0.647345	0.676645	1.54488	1.47788	-0.274065	-0.254825	-6.63599	8364.08	4455.08	2083.02	1107.63	0.532034	0.556128	1.87962	1.79815	-0.16069	-0.14145	-3.10064	6234.88	4335.67	2192.73	1170.25
	10950		META1_2984	eno1	ENO	Enolase	2-phosphoglycerate = phosphoenolpyruvate + H2O	4.2.1.11		0.00561566	0	-0.329408	8727.51	8841.54	2975.42	2224.2	1.0131	1	0.987232	1	-0.205352	-0.210968	-4.20257	8262.39	5165.55	5305.29	1274.83	0.623251	0.615223	1.6046	1.62543	-0.231277	-0.236892	-5.11603	10503.7	6195.71	2627.09	1513.94	0.587184	0.579572	1.70344	1.72541	-0.169267	-0.174883	-3.14375	7860.57	5333.25	2761.7	1453.1
	11866		META1_2944	gck	GCK	Glycerate kinase	ATP + D-glycerate <=> 2-phosphoglycerate + ADP + 2 H+	2.7.1.-		-0.0369105	0	-0.417871	627.187	573.645	261.701	204.873	0.919035	1	1.08931	1	0.718314	0.755224	-20.831	641.185	3324.25	474.383	849.185	5.22812	5.69147	0.191301	0.175702	0.891616	0.928526	-25.3643	838.565	6479.35	261.843	1663.77	7.79142	8.48254	0.128347	0.117889	0.808409	0.84532	-24.4519	626.706	4021.66	266.173	1171.79
	3312		META1_1727	hpr	HPR	Hydroxypyruvate reductase	D-glycerate + NAD(P)+ = hydroxypyruvate + NAD(P)H	1.1.1.81		0.0482179	0	-0.795641	2372.27	2659.52	838.264	706.027	1.11742	1	0.894916	1	0.872217	0.823999	-25.998	4747.42	35545.9	3032.43	8190.85	7.45256	6.66806	0.134237	0.149969	1.08021	1.032	-29.4563	3643.76	43781.8	953.95	10707.4	12.0301	10.7646	0.0831459	0.0928974	1.11624	1.06803	-29.8888	4402.38	57704.9	1594.8	14871.7
	12088		META1_1726	sga	SGA	Serine glyoxylate aminotransferase	L-serine + glyoxylate = 3-hydroxypyruvate + glycine	2.6.1.45		0.0433171	0	-0.425324	13489.4	14884.5	4656.86	3721.63	1.10504	1	0.905196	1	1.2462	1.20288	-31.2627	10918.3	192165	7504.83	43793.5	17.6277	15.9543	0.0567289	0.0626789	1.33988	1.29656	-31.9842	13374.9	304506	3622.32	64952.2	21.9037	19.7952	0.0457894	0.0505174	1.4244	1.38108	-32.5386	10012.1	274862	3735.82	64946.9
	7918		META1_3384	glyA	SHMT	Serine hydroxymethyltransferase	L-serine + tetrahydrofolate <=> glycine + 5,10-methylene-THF + H2O	2.1.2.1		0.0681003	0	-0.856217	17001.7	19880.8	5808.16	4892.08	1.1698	1	0.854895	1	0.421203	0.353103	-12.3917	15100.7	39971.7	10061.3	9133.12	2.63762	2.25477	0.379146	0.443504	0.551794	0.483694	-17.22	21731.1	78337.8	5337.82	18895.8	3.56293	3.04575	0.280685	0.328327	0.504544	0.436444	-15.5947	15036.2	48150.2	5398.38	12453.4
	6958		META1_1733	mclA1	MCL	Malyl-CoA Lyase	L-malyl-CoA = glyoxylate + acetyl-CoA/2-mwthylmalyl-CoA=propionyl-CoA+ glyoxylate	4.1.3.24		0.0587772	0	-0.789088	2458.16	2795.26	853.266	754.516	1.14498	1	0.873463	1	0.0841096	0.0253324	-1.25054	2302.96	2795.78	1461.46	712.141	1.2137	1.06006	0.823932	0.943339	1.29628	1.2375	-31.6558	3432.21	68364.5	908.292	16051.5	19.7836	17.2782	0.0505539	0.0578765	1.36973	1.31095	-32.2041	2212.65	52124.8	827.869	13467.4
	5381		META1_4295	mclA2	MCL	Malyl-CoA Lyase	L-malyl-CoA = glyoxylate + acetyl-CoA/2-mwthylmalyl-CoA=propionyl-CoA+ glyoxylate	4.1.3.24		0.0361437	0	-0.411996	11920.9	12951.7	4085.47	3207.18	1.08679	1	0.920145	1	0.370449	0.334305	-10.3746	10817.5	25465.5	6970.75	5881.61	2.34665	2.15926	0.426139	0.463122	0.296009	0.259865	-7.53149	14422.8	29194.3	3680.57	6671.52	1.97701	1.81913	0.505815	0.549712	0.0461373	0.00999366	-0.592359	11375.1	12702.7	4042.11	3318.17
	6989		META1_1730	mtkA	MTK	Malate thiokinase, a subunit	malate + ATP + coenzyme A = phosphate + L-malyl-CoA + ADP + H+	6.2.1.9		0.0698628	0	-0.906768	2186.25	2586.65	787.914	686.091	1.17453	1	0.85141	1	0.936164	0.866301	-27.2525	4305.64	37653.5	2895.62	8599.76	8.64168	7.35023	0.11595	0.13605	1.60616	1.5363	-33.4287	2862.67	116663	777.725	27071.4	40.3801	34.3794	0.0247655	0.0290872	1.27384	1.20397	-31.4983	4383.06	82691.3	1628.11	21054.9
	6988		META1_1731	mtkB	MTK	Malate thiokinase, b subunit	malate + ATP + coenzyme A = phosphate + L-malyl-CoA + ADP + H+	6.2.1.9		0.137829	0	-2.25974	1623.17	2234.86	585.38	610.177	1.37356	1	0.728096	1	1.30181	1.16398	-31.6843	1536.46	30874	1032.43	7279.43	20.0365	14.5874	0.0499124	0.0685523	1.7911	1.65327	-34.0185	2042.37	126023	569.618	29727.9	61.8289	45.0063	0.0161803	0.0222191	1.73357	1.59574	-33.8608	1579.62	86207.3	608.162	22145.1
PHB Cycle
	6075		META1_3124	atoD/scoA (formally kstA)	ATO	succinyl-CoA:acetoacetate CoA-transferase subunit A	succinyl-CoA + acetoacetate = succinate + acetoacetyl-CoA	2.8.3-		0.0497932	0	-0.96405	12550.3	14026.7	4237.15	3446.59	1.12149	1	0.891679	1	0.0593902	0.00959694	-1.07253	13183.9	15181.8	8304.84	3525.16	1.14661	1.02234	0.872238	0.978145	-0.168488	-0.218281	-4.00513	18920.9	12635.4	4444.16	3059.42	0.681489	0.604949	1.48059	1.65303	-0.156181	-0.205974	-3.00095	13466.4	9406.54	4711.01	2475.37
	6074	6074	META1_3125	atoA/scoB (formally kstB)	ATO	succinyl-CoA:acetoacetate CoA-transferase subunit B	succinyl-CoA + acetoacetate = succinate + acetoacetyl-CoA	2.8.3-		0.042531	0	-0.647422	6770.98	7463.81	2330.09	1862.29	1.10307	1	0.906862	1	0.0332457	-0.00928531	-0.557214	6561.07	7110.51	4159.36	1730.59	1.07989	0.978847	0.92659	1.02161	-0.129814	-0.172345	-2.19119	8836.98	6608.5	2241.32	1582.53	0.741639	0.672442	1.34841	1.48712	-0.146074	-0.188605	-2.54451	7265.12	5190.95	2545.06	1423.22
	9145		META1_5182	hbd	HBDH	3hydroxybutyrate dehydrogenase	3-hydroxybutyrate + NAD=acetoacetate + NADH + H+	1.1.1.30		0.0767984	0	-1.04761	8721.18	10390.2	2980.1	2584.25	1.19347	1	0.837944	1	0.112954	0.0361552	-1.82872	9959.17	12961.2	6347.47	3051.14	1.29706	1.08681	0.770999	0.920121	-0.156437	-0.233236	-2.82938	12281.8	8570.69	3047.03	2099.32	0.697542	0.584473	1.43366	1.71094	-0.276604	-0.353403	-6.76947	10457.9	5541.24	3659	1495.06
	1094		META1_0419	depA	PHBdepA	hydroxyalkanoate depolymerase	poly[R(3)-hydroxybutanoate]n + H20 =poly[R(3)-hydroxybutanoate](n-1)+D-(-)-3hydroxybutanoate	3.1.1.-		-0.017694	0	-0.184693	853.868	821.052	332.648	268.703	0.960172	1	1.04169	1	0.40302	0.420714	-10.0556	848.804	2141.69	603.61	567.147	2.52953	2.6346	0.395366	0.379564	0.213366	0.23106	-3.61965	1115.5	1818.76	327.84	487.935	1.63446	1.70239	0.611845	0.587408	0.0897802	0.107474	-1.10815	837.774	1032.03	334.065	331.506
	7801		META1_4597	depB	PHBdepB	hydroxyalkanoate depolymerase	poly[R(3)-hydroxybutanoate]n + H20 =poly[R(3)-hydroxybutanoate](n-1)+D-(-)-3hydroxybutanoate	3.1.1.-		-0.036084	0	-0.336761	2893.64	2664.64	1027.33	719.962	0.920379	1	1.08676	1	0.203985	0.240069	-4.0988	3575.73	5712.29	2434.49	1413.69	1.60094	1.73808	0.625757	0.575349	0.572595	0.608679	-17.8034	3551.16	13157.5	965.36	3246.23	3.73829	4.06143	0.267598	0.246218	0.215872	0.251956	-4.64421	4319.89	7073.64	1571.44	1963.1
	6009		META1_3304	phaC	PHAC	poly-β-hydroxybutyrate polymerase subunit	3-hydroxybutyryl-CoA + poly[(R)-3-hydroxybutanoate]n <=> poly[(R)-3-hydroxybutanoate](n+1) + coenzyme A	2.3.1.-		0.0112216	0	-0.157154	1623.66	1666.93	591.285	480.736	1.02619	1	0.974507	1	0.232714	0.221492	-4.85719	1934.89	3305.82	1297.31	841.499	1.70911	1.6653	0.585253	0.600493	0.00358877	-0.00763282	-0.180625	2292.4	2306.27	620.746	615.139	1.00834	0.982578	0.991815	1.01773	-0.175786	-0.187008	-3.2515	2023.79	1353.31	737.199	431.512
	3831		META1_3701	phaB	AACoR	Acetoacyl-CoA reductase	acetoacetyl-CoA + NADPH + H+ = 3-hydroxybutyryl-CoA + NADP+	1.1.1.36		0.256419	0	-6.1114	29379.8	52958.1	9874.49	12878.8	1.80477	1	0.554096	1	0.363864	0.107445	-10.1303	33566.9	78152.4	21484	17711.8	2.31164	1.28069	0.432706	0.780827	0.321695	0.0652765	-8.61997	44236.6	92935.5	10231.2	22965.9	2.09752	1.16219	0.476777	0.860446	0.36032	0.103902	-10.0049	32878.6	76058.8	11556.3	19221.9
Ethylmalonyl-CoA Pathway
	11702	3830	META1_3700	phaA	bKT	b-ketothiolase	2 acetyl-CoA = acetoacetyl-CoA + coenzyme A, 2-methylacetoacetyl-CoA + coenzyme A = propionyl-CoA + acetyl-CoA	2.3.1.9		0.105954	0	-1.51186	15970	20378.5	5476.22	5032.13	1.2763	1	0.783513	1	0.178119	0.0721644	-3.36615	14539.9	21972.6	9584.35	5081.68	1.50717	1.18077	0.663627	0.846907	0.076466	-0.0294881	-1.00832	19915.2	23752.9	4870.75	5916.61	1.19252	0.934355	0.838563	1.07026	-0.0404487	-0.146403	-0.492772	14292.1	12993.2	5024.89	3465.36
	3830		META1_3700	phaA	bKT	b-ketothiolase	2 acetyl-CoA = acetoacetyl-CoA + coenzyme A, 2-methylacetoacetyl-CoA + coenzyme A = propionyl-CoA + acetyl-CoA	2.3.1.9		0.130364	0	-2.15517	47772	64216.4	15984.9	15937.5	1.35009	1	0.740689	1	0.215567	0.0852027	-4.65824	52237.1	85888.6	32736.2	19782.2	1.64273	1.21675	0.608742	0.821859	0.0705593	-0.0598049	-1.02774	62290.7	73340.1	14709.8	18716.1	1.17641	0.871355	0.850043	1.14764	-0.0357335	-0.166098	-0.706076	53132.2	49108.9	18674.8	12646.3
	1208	15229	META1_3675	croR	CroR	Crotonase, R-specific enoyl-CoA hydratase	3-hydroxybutyryl-CoA = crotonyl-CoA + H2O	4.2.1.55		0.150166	0	-2.58862	5670.21	8014.82	1994.13	2048.06	1.41309	1	0.707681	1	0.410857	0.260691	-11.9405	5757.99	14777.9	3920.06	3562.2	2.57548	1.8226	0.388278	0.548667	0.275734	0.125568	-6.67344	8139.67	15429.1	2077.71	3690.08	1.88683	1.33527	0.529988	0.748914	0.195165	0.0449991	-3.86502	5543.03	8674.15	1999.86	2322.74
	9548		META1_0178	ccr	CCR	Crotonyl-CoA reductase	crotonyl-CoA + CO2 + NADPH + H+ = ethylmalonyl-CoA + NADPH	None listed		0.0130213	0	-0.418418	41873.5	43089.8	14153.8	10597.2	1.03044	1	0.970464	1	0.254819	0.241797	-5.98297	41462.1	74860	26546.4	17117.4	1.79829	1.74501	0.55619	0.573063	0.241644	0.228623	-5.54241	54455.6	96075.7	13217.5	23624.5	1.7444	1.69287	0.573267	0.590714	0.191758	0.178737	-3.84472	44739.6	69924.8	15861.6	17949.5
	5448		META1_0839	epm	EPM	Methylmalonyl-CoA/Ethylmalonyl-CoA Epimerase	(S)-methylmalonyl-CoA = (R)-methylmalonyl-CoA, (S)-ethylmalonyl-CoA = (R)-ethylmalonyl-CoA	5.1.99.1		0.180957	0	-3.42705	9996.92	15159.3	3434.66	3799.7	1.517	1	0.659281	1	-0.123763	-0.30472	-1.8704	10016.1	7531.75	6665.5	1830.1	0.752058	0.495769	1.32977	2.01707	-0.403116	-0.584073	-11.602	15069.1	5976.23	3738.03	1459.79	0.395291	0.260572	2.53016	3.83771	-0.201673	-0.38263	-4.16115	10017.5	6324.11	3537.34	1685.7
	15		META1_0180	ecm (formally meaA)	ECM	Ethylmalonyl-CoA mutase	ethylmalonyl-CoA=methylsuccinyl-CoA, hydroxyisobutyryl-CoA + NADH + CO2= propionyl-CoA + NAD + H2O	None listed		0.0948526	0	-1.31496	3223.67	4006.12	1124.25	1045.05	1.24411	1	0.803808	1	0.671551	0.576699	-21.0839	3160.52	14908.5	2127.24	3533.14	4.69431	3.7731	0.213044	0.265034	0.7402	0.645347	-22.9935	4223.39	23341.4	1104.62	5522.67	5.49794	4.41924	0.181887	0.226283	0.598741	0.503888	-18.8905	3173.47	12599.4	1149.95	3386.51
	4586		META1_2223	msd (formally ibd2)	MeSuCoADH	(2S)-methylsuccinyl-CoA dehydrogenase	methylsuccinyl-CoA + FAD = mesaconyl-CoA + FADH2	1.3.99.-		-0.0252215	0	-0.24902	11857.5	11206.3	4131.05	2756.41	0.943598	1	1.05981	1	0.0757703	0.100992	-0.969017	16507.1	19800.9	11208.9	4505.03	1.19063	1.2618	0.839919	0.792516	0.0343651	0.0595865	-0.336361	14816.1	15991.2	3818.2	3921.73	1.08237	1.14706	0.923941	0.871793	0.0384123	0.0636338	-0.382355	16917.7	18484.3	6015.16	4896.48
	1146		META1_4153	mcd (formally meaC)	MCCoAH	mesaconyl-CoA hydratase	mesaconyl-CoA + H2O <=> β-methylmalyl-CoA	None listed		0.100156	0	-1.3794	5020.04	6322.04	1747.55	1607.1	1.25938	1	0.794049	1	-0.195937	-0.296093	-3.84558	5214.46	3329.83	3466.18	834.001	0.636984	0.505717	1.57037	1.97739	-0.398606	-0.498761	-11.1886	6782.41	2717.78	1702.48	691.722	0.399388	0.317131	2.50384	3.15327	-0.170257	-0.270413	-3.17238	5217.68	3543.85	1860.9	971.564
	6958		META1_1733	mclA	MeMaCL	Methylmalyl-CoA Lyase	L-malyl-CoA = glyoxylate + acetyl-CoA/2-methylmalyl-CoA=propionyl-CoA+ glyoxylate	4.1.3.24		0.0587772	0	-0.789088	2458.16	2795.26	853.266	754.516	1.14498	1	0.873463	1	0.0841096	0.0253324	-1.25054	2302.96	2795.78	1461.46	712.141	1.2137	1.06006	0.823932	0.943339	1.29628	1.2375	-31.6558	3432.21	68364.5	908.292	16051.5	19.7836	17.2782	0.0505539	0.0578765	1.36973	1.31095	-32.2041	2212.65	52124.8	827.869	13467.4
	5381		META1_4295	mclA2	MeMaCL	Methylmalyl-CoA Lyase	L-malyl-CoA = glyoxylate + acetyl-CoA/2-methylmalyl-CoA=propionyl-CoA+ glyoxylate	4.1.3.24		0.0361437	0	-0.411996	11920.9	12951.7	4085.47	3207.18	1.08679	1	0.920145	1	0.370449	0.334305	-10.3746	10817.5	25465.5	6970.75	5881.61	2.34665	2.15926	0.426139	0.463122	0.296009	0.259865	-7.53149	14422.8	29194.3	3680.57	6671.52	1.97701	1.81913	0.505815	0.549712	0.0461373	0.00999366	-0.592359	11375.1	12702.7	4042.11	3318.17
	11711		META1_3203	pccA	PCC	Propionyl-CoA carboxylase, a subunit	propionyl-CoA + ATP + bicarbonate = (S)-methylmalonyl-CoA + phosphate + ADP + 2 H+/ butyryl-CoA + HCO3 + ATP= ethylmalonyl-CoA + ADP + Pi	6.4.1.3		0.0173436	0	-0.303917	7051.98	7322.87	2417.45	1851.12	1.04076	1	0.960869	1	-0.00176632	-0.0191099	-0.294117	7433.98	7417.91	4803.11	1801.83	0.995944	0.956952	1.00408	1.04498	0.0355799	0.0182363	-0.389537	9157.04	9922.72	2307.84	2430.58	1.08552	1.04288	0.921464	0.958879	0.106125	0.0887818	-1.6726	7390.96	9463.78	2612.48	2500.56
	9543		META1_0172	pccB	PCC	Propionyl-CoA carboxylase, b subunit	propionyl-CoA + ATP + bicarbonate = (S)-methylmalonyl-CoA + phosphate + ADP + 2 H+/ butyryl-CoA + HCO3 + ATP= ethylmalonyl-CoA + ADP + Pi	6.4.1.3		0.062916	0	-0.769791	8577.62	9938.35	2979.1	2449.82	1.15591	1	0.865153	1	0.157366	0.0944495	-2.77227	10568.4	15173	6760.27	3600.4	1.43682	1.24294	0.696099	0.804545	0.113301	0.050385	-1.64814	10943.7	14198.3	2778.64	3470.83	1.2983	1.12301	0.770503	0.890461	0.127876	0.0649599	-2.05845	11047.6	14885.8	3944.73	3880.38
	5448		META1_0839	epm	EPM	Methylmalonyl-CoA/Ethylmalonyl-CoA Epimerase	(S)-methylmalonyl-CoA = (R)-methylmalonyl-CoA, (S)-ethylmalonyl-CoA = (R)-ethylmalonyl-CoA	5.1.99.1		0.180957	0	-3.42705	9996.92	15159.3	3434.66	3799.7	1.517	1	0.659281	1	-0.123763	-0.30472	-1.8704	10016.1	7531.75	6665.5	1830.1	0.752058	0.495769	1.32977	2.01707	-0.403116	-0.584073	-11.602	15069.1	5976.23	3738.03	1459.79	0.395291	0.260572	2.53016	3.83771	-0.201673	-0.38263	-4.16115	10017.5	6324.11	3537.34	1685.7
	12744		META1_5251	mcmA-half1	MMCM	Methylmalonyl-CoA mutase, a subunit	(R)-methylmalonyl-CoA = succinyl-CoA	5.4.99.2		-0.0401454	0	-0.4109	2202.13	2007.25	779.949	558.019	0.911705	1	1.09685	1	0.404231	0.444377	-11.6237	3743.57	9559.42	2436.54	2282.33	2.53648	2.78213	0.394247	0.359437	0.519094	0.559239	-15.7129	2978.38	9769.36	816.471	2509.85	3.30441	3.62443	0.302626	0.275906	0.422305	0.46245	-12.4272	3633.61	9608.24	1309.14	2623.66
	448	RMQ12744	META1_5251	mcmA-half2	MMCM	Methylmalonyl-CoA mutase, a subunit	(R)-methylmalonyl-CoA = succinyl-CoA	5.4.99.2		-0.0465415	0	-0.490105	2606.43	2349.04	921.159	639.786	0.898548	1	1.11333	1	0.392523	0.439065	-11.173	4100.12	10210.7	2704.05	2429.77	2.46914	2.7483	0.405041	0.363861	0.521517	0.568058	-15.8242	3384.53	11286.2	910.317	2927.16	3.32301	3.69878	0.300952	0.27036	0.427193	0.473734	-12.6202	3958.68	10605.5	1413.54	2936.16
	12432		META1_2390	mcmB	MMCM	Methylmalonyl-CoA mutase, b subunit	(R)-methylmalonyl-CoA = succinyl-CoA	5.4.99.2		0.0548953	0	-0.6319	2228.26	2531.8	799.083	699.61	1.13474	1	0.881263	1	0.441165	0.386269	-12.8837	2184.59	5999.4	1520.93	1489.18	2.76163	2.43371	0.362106	0.410895	0.551397	0.496502	-17.0674	2957.85	10505.5	796.854	2571.9	3.55966	3.13691	0.280941	0.318785	0.546372	0.491477	-17.0555	2262.64	7953.91	839.737	2209.02
TCA Cycle
	6488		META1_1537	mdh	MDH	Malate DH	malate + NAD+ = oxaloacetate + NADH + H+	1.1.1.37		0.0231591	0	-1.22995	20871.4	21737.1	7498.39	5463.55	1.05478	1	0.94808	1	-0.107065	-0.130224	-1.8457	24641	19018.4	17357.1	4486.6	0.78152	0.740928	1.27959	1.34966	-0.54039	-0.563549	-16.8512	32348.6	9256.5	8279.99	2338.47	0.288177	0.273181	3.47087	3.66057	-0.581519	-0.604678	-18.2733	24930	6484.83	9030.98	1765.67
	5335		META1_2857	fumC1	FUM	Fumarase	malate = fumarate + H2O	4.2.1.2		0.0868357	0	-1.37832	4609.08	5606.07	1575.06	1423.66	1.22136	1	0.818788	1	0.0356893	-0.0511464	-0.658832	4538.55	4923.78	2854.64	1219.72	1.08572	0.888901	0.921168	1.12498	-0.584391	-0.671227	-17.6187	6841.15	1773.26	1664.74	470.371	0.260384	0.213193	3.84057	4.69058	-0.57765	-0.664486	-17.919	4390.56	1164.88	1526.45	356.68
	11545		META1_1338	fumC2	FUM	Fumarase	malate = fumarate + H2O	4.2.1.2		-0.101044	0	-2.05784	3200.28	2525.87	1090.52	671.229	0.792523	1	1.26212	1	-0.386831	-0.285786	-10.5643	4002.92	1630.93	2435.51	444.229	0.410365	0.517861	2.43687	1.93102	-0.461904	-0.36086	-12.9671	4203.23	1452.73	1075.71	400.576	0.34523	0.435652	2.89679	2.29541	-0.448011	-0.346967	-13.3365	4625.96	1641.8	1612.93	491.978
	12137		META1_3861	sdhA/B	SDH	Succinate DH flavoprotein subunit/succinate DH Fe-S cluster subunit	succinate + an oxidized electron acceptor = fumarate + a reduced electron acceptor	1.3.99.1		-0.0184052	0	-1.05829	10092.9	9619.04	3390.66	2376.54	0.958506	1	1.04329	1	-0.535961	-0.517556	-16.428	9569.32	2803.54	5894.33	708.547	0.291199	0.303699	3.43647	3.29273	-0.608919	-0.590514	-18.8614	13248.7	3246.74	3207.68	816.564	0.246085	0.256736	4.06371	3.89505	-0.690662	-0.672256	-21.4661	9490.6	1923.09	3250.74	552.883
	5704	16373	META1_3859	sdhC	SDH	Succinate DH cytochrome B556 subunit	succinate + an oxidized electron acceptor = fumarate + a reduced electron acceptor	1.3.99.1		-0.00879642	0	-0.541415	7807.07	7662.86	2740.87	1976.49	0.979962	1	1.02047	1	-0.577905	-0.569108	-18.0856	12893.7	3397.5	8717.94	877.039	0.264302	0.269707	3.78364	3.70773	-0.606534	-0.597738	-18.8939	11502.9	2840.48	2954.69	754.741	0.247448	0.252501	4.04158	3.96039	-0.808446	-0.79965	-24.69	12816.2	1987.52	4538.06	588.934
	5703		META1_3860	sdhD	SDH	Succinate DH membrane anchor subunit	succinate + an oxidized electron acceptor = fumarate + a reduced electron acceptor	1.3.99.1		0.00489201	0	-0.116836	11423.7	11536.3	3896.34	2906.93	1.01134	1	0.988807	1	-0.511296	-0.516188	-15.7576	11884.6	3669.16	7754.41	921.666	0.308118	0.304657	3.24571	3.28238	-0.624917	-0.629809	-19.6328	15327.2	3639.15	3907.33	910.321	0.237186	0.234526	4.21622	4.26392	-0.782855	-0.787747	-24.1214	11987.8	1976.15	4181.43	579.578
	6487		META1_1538	sucC	SUCOAS	Succinyl-CoA synthetase, b subunit	succinate + ATP + coenzyme A = succinyl-CoA + ADP + phosphate + H+	6.2.1.5		-0.0672435	0	-0.760791	12945.7	11089.1	4486	2766.1	0.856558	1	1.16746	1	-0.271346	-0.204102	-6.5083	19466.1	10425.2	12636.2	2482.72	0.535371	0.625026	1.86787	1.59993	-0.537412	-0.470169	-16.5535	15982.7	4626.02	4135.13	1220.47	0.290127	0.338712	3.44677	2.95236	-0.587714	-0.52047	-18.5014	19953.2	5153.8	7095.26	1439.76
	6486	14952	META1_1539	sucD	SUCOAS	Succinyl-CoA synthetase a subunit	succinate + ATP + coenzyme A = succinyl-CoA + ADP + phosphate + H+	6.2.1.5		0.0237316	0	-0.315776	3937.62	4157.47	1369.54	1078.09	1.05616	1	0.946822	1	-0.199377	-0.223108	-3.93007	3829.66	2433.46	2492.54	618.614	0.631863	0.598262	1.58262	1.67151	-0.468773	-0.492505	-13.5165	4939.55	1700.79	1258.63	439.172	0.339803	0.321733	2.94289	3.10817	-0.439359	-0.463091	-12.961	3608.33	1312.01	1266.77	402.359
	7071		META1_5129	gltA/citA	CS	Citrate synthase	oxaloacetate + acetyl-CoA + H2O = citrate + coenzyme A + H+	2.3.3.1		0.0748335	0	-1.10681	13301.8	15797.9	4517.38	3875.01	1.18806	1	0.841729	1	-0.110174	-0.185008	-1.94884	17579.7	13822.9	11351	3160.97	0.775974	0.653119	1.28883	1.53112	-0.370141	-0.444974	-10.3421	20821.6	8790.2	4970.29	2221.39	0.426441	0.358943	2.34499	2.78596	-0.314412	-0.389246	-8.22743	16895.8	8196.75	5899.48	2166.13
	9345		META1_2828	acnA	ACN	Aconitate hydratase	citrate = cis-aconitate + H2O, cis-aconitate + H2O = D-isocitrate	4.2.1.3		-0.0581892	0	-0.92324	13212.9	11570	4497.67	2835.92	0.874603	1	1.14338	1	-0.664718	-0.606529	-20.8259	15991.6	3448.16	9808.28	876.148	0.216412	0.247441	4.62081	4.04137	-0.703523	-0.645334	-21.9859	17642.8	3490.09	4476.41	893.665	0.197914	0.22629	5.0527	4.4191	-0.501043	-0.442854	-15.4071	16256.5	5109.46	5621.84	1395.51
	1050		META1_3354	icdA	ICD	Isocitrate DH	D-isocitrate + NADP+ = 2-oxoglutarate + CO2 + NADPH	1.1.1.42		0.0546766	0	-0.639897	15887.7	18023.4	5442.87	4436.39	1.13417	1	0.881705	1	-0.424347	-0.479024	-12.4962	23949.6	9010.31	15138.4	2148.44	0.376403	0.331876	2.65673	3.01317	-0.886233	-0.94091	-26.2703	23335	3058.26	5695.42	845.077	0.129947	0.114575	7.69543	8.7279	-0.817831	-0.872507	-24.9544	23194.9	3525.75	8015.47	1011.14
	11485		META1_1540	sucA	aKGDH	2-Oxoglutarate dehydrogenase, E1 component	2-oxoglutarate + dihydrolipoyltranssuccinylase N6-(lipoyl)lysine -> dihydrolipoyltranssuccinylase N6-(S-succinyldihydrolipoyl)lysine + CO2	1.2.4.2		-0.00815167	0	-0.28455	11073.2	10856.8	3789.64	2704.5	0.981407	1	1.01895	1	-0.2482	-0.240048	-5.69546	11679.8	6616.49	7507.16	1606.44	0.564695	0.575376	1.77098	1.73799	-0.567128	-0.558977	-17.7169	14767.1	4008.44	3735.97	1007.17	0.27095	0.276073	3.69102	3.62224	-0.626424	-0.618272	-19.7616	12139.6	2873.86	4243.25	806.913
	11484		META1_1541	sucB	aKGDH	Dihydrolipoamide succinyltransferase, E2 component of 2-oxoglutarate DH	succinyl-CoA + dihydrolipoyltranssuccinylase N6-(dihydrolipoyl)lysine -> dihydrolipoyltranssuccinylase N6-(S-succinyldihydrolipoyl)lysine + coenzyme A	2.3.1.61		0.029968	0	-1.06191	9289.84	9984.57	3162.86	2434.32	1.07144	1	0.933323	1	0.00408372	-0.0258843	-0.994911	9303.36	9459.85	5820.27	2238.54	1.00957	0.942141	0.990763	1.06141	-0.597604	-0.627572	-18.4656	12378.1	3138.53	3035.73	775.007	0.252591	0.235737	3.95937	4.24202	-0.527309	-0.557277	-16.3659	9608.42	2838.14	3318.67	808.171
	7759		META1_1542	pdhD2	PdhD2	Dihydrolipoamide dehydrogenase, E3 componentof 2-oxoglutarate DH and pyruvate DH and the glycine cleavage system-this enzyme clusters with the sucAB genes	lipoamide acyltransferase N6-(dihydrolipoyl)lysine + NAD+ <=> lipoamide acyltransferase N6-(lipoyl)lysine + NADH + H+	1.8.1.4		0.016257	0	-0.379395	18511.2	19317.9	6422.24	4661.21	1.03815	1	0.963268	1	-0.00898365	-0.0252406	-0.39941	21655.8	21299.4	14309.3	4864.37	0.979747	0.943538	1.02113	1.05984	-0.276535	-0.292792	-6.69074	20258.1	10719.8	5057.59	2680.99	0.529016	0.509575	1.89033	1.96242	-0.132231	-0.148488	-2.13232	23337.2	17260.1	8329.81	4492.38
Leads into Pentose Phosphate Pathway
	3250	3250	META1_1218	pgm1/gpmA1	PGM	phosphoglycerate mutase (protein complex)	3-phosphoglycerate = 2-phosphoglycerate	5.4.2.1		-0.0826552	0	-0.385168	246.303	203.483	130.625	107.857	0.826694	1	1.20964	1	-0.01193	0.0707252	-0.0480825	285.124	277.872	212.976	121.081	0.972904	1.17686	1.02785	0.849718	-0.0212287	0.0614265	-0.0444027	354.662	337.095	134.186	131.957	0.952294	1.15193	1.0501	0.868107	-0.116667	-0.0340122	-1.07959	346.18	263.687	162.934	125.321
	9743	9743	META1_1116	pgm2/gpmA2	PGM	phosphoglycerate mutase (protein complex)	3-phosphoglycerate = 2-phosphoglycerate	5.4.2.1		0.0148131	0	-0.20162	1432.95	1481.42	519.57	432.342	1.0347	1	0.966467	1	-0.502063	-0.516876	-10.7912	1261.67	399.181	823.949	158.823	0.314729	0.304176	3.17733	3.28758	-0.483671	-0.498484	-11.3409	1862.6	610.264	491.733	196.912	0.328344	0.317333	3.04559	3.15126	-0.353039	-0.367852	-9.11687	1370.28	607.657	507.075	219.447
	2884	2884	META1_2472	pgm3/gpmA3	PGM	phosphoglycerate mutase (protein complex)	3-phosphoglycerate = 2-phosphoglycerate	5.4.2.1		-0.00418262	0	-0.103099	17252.2	17090	5941.43	4228.84	0.990415	1	1.00968	1	-0.692615	-0.688432	-21.7324	17123	3474.4	11219	887.385	0.202948	0.204912	4.92737	4.88014	-0.893461	-0.889278	-26.4478	23603.2	3016.61	5903.08	795.026	0.127802	0.129039	7.82458	7.74958	-0.64713	-0.642948	-20.4429	17601.7	3967.11	6181.77	1114.58
	7041	7041	META1_4686	pgm4/gpmA4	PGM	putative phosphoglycerate mutase (protein complex)	3-phosphoglycerate = 2-phosphoglycerate	5.4.2.1		-0.110221	0	-1.71098	12876.8	10004.7	4497.09	2552.63	0.775853	1	1.2889	1	-0.170862	-0.0606408	-3.23652	16564.4	11159.5	11159.1	2694.16	0.674743	0.869679	1.48205	1.14985	-0.112358	-0.00213729	-1.94688	13960.3	10659	3665.72	2679.63	0.772044	0.995091	1.29526	1.00493	-0.112917	-0.0026959	-1.74658	18741.9	14411.3	6775.67	3879.98
	8098	8098	META1_0139	pgm5, gpmA5	PGM	phosphoglycerate mutase	3-phosphoglycerate = 2-phosphoglycerate	5.4.2.1		-0.0719923	0	-0.160403	125.063	106.077	90.928	81.2399	0.847242	1	1.1803	1	-0.108252	-0.0362601	-0.187933	145.868	113.628	126.954	84.1071	0.779377	0.919899	1.28308	1.08708	-0.0164138	0.0555786	-0.190764	172.346	165.013	91.1157	89.1213	0.962911	1.13652	1.03852	0.879876	-0.0500627	0.0219297	-0.282936	195.87	174.739	114.214	101.382
	8726	8726	META1_2369	pgk	PGK	3-phosphoglycerate kinase	3-phosphoglycerate + ATP = 1,3-diphosphateglycerate + ADP + H+	2.7.2.3		-0.0800032	0	-1.024	3475.87	2878.94	1250.8	770.8	0.831758	1	1.20227	1	-0.387331	-0.307328	-10.3195	3150.89	1289.96	2118.44	363.642	0.409891	0.492801	2.43967	2.02921	-0.460145	-0.380142	-12.8811	4219.85	1455.92	1111.71	407.928	0.346621	0.416734	2.88499	2.39961	-0.426801	-0.346798	-12.4528	3235.98	1208.43	1165.37	384.241
	10869	10869	META1_2367	gap	GAP	glyceraldehyde-3-phosphate dehydrogenase subunit (Gap)	D-glyceraldehyde-3-phosphate + phosphate + NAD+ = 1,3-diphosphateglycerate + NADH + H+	1.2.1.12		-0.00347058	0	-0.201066	49385.6	48929.9	16721.2	12150.1	0.992041	1	1.00802	1	-0.32702	-0.32355	-8.67071	49100.5	23107.7	30974.2	5386.1	0.470955	0.474734	2.12334	2.10644	-0.621676	-0.618206	-19.5934	63411	15241.6	15505	3754.76	0.238959	0.240876	4.18482	4.15151	-0.471558	-0.468088	-14.3156	47255.2	15825.5	16379.4	4227.57
	10870	10869	META1_2367	gap	GAP	glyceraldehyde-3-phosphate dehydrogenase subunit (Gap)	D-glyceraldehyde-3-phosphate + phosphate + NAD+ = 1,3-diphosphateglycerate + NADH + H+	1.2.1.12		-0.0959242	0	-1.36984	32768.2	26227.8	11084.1	6481.5	0.801818	1	1.24717	1	-0.422046	-0.326122	-12.4156	30811.1	11669.4	19728.6	2744.65	0.378402	0.47193	2.64269	2.11896	-0.664007	-0.568083	-20.9255	42404	9196.54	10396.2	2319.76	0.216767	0.270344	4.61325	3.69899	-0.57544	-0.479516	-18.1043	31823	8485.68	11306.3	2233.1
	6890	10869	META1_2367	gap	GAP	glyceraldehyde-3-phosphate dehydrogenase subunit (Gap)	D-glyceraldehyde-3-phosphate + phosphate + NAD+ = 1,3-diphosphateglycerate + NADH + H+	1.2.1.12		-0.0790137	0	-0.979692	37014.8	30791.6	12474.7	7719.76	0.833655	1	1.19954	1	-0.422847	-0.343833	-12.4572	34101.8	12879.2	21930.6	3043.69	0.377705	0.453072	2.64757	2.20716	-0.636134	-0.55712	-20.0907	44417.7	10287.1	11050.6	2556.37	0.231135	0.277255	4.32647	3.60678	-0.54122	-0.462206	-16.9096	33592.3	9653.55	11813.1	2570.33
Pentose Phosphate Metabolism
	6065	6065	META1_1864	zwf1	G6PDH	Glucose-6-phosphate 1-dehydrogenase	β-D-glucose-6-phosphate + NADP+ = D-glucono-δ-lactone-6-phosphate + NADPH + H+	1.1.1.49		-0.0651037	0	-0.756609	2429.45	2097.78	868.67	572.137	0.86085	1	1.16181	1	0.101645	0.166749	-1.42612	4492.12	5717.76	3060.3	1379.8	1.26371	1.46808	0.791331	0.681163	-0.105332	-0.0402284	-1.31896	2703.31	2116.58	722.272	563.996	0.784639	0.911531	1.27448	1.09705	0.0599756	0.125079	-0.652633	4840.88	5565.94	1749.41	1501.05
	9090	9090	META1_2490	zwf2	G6PDH	Glucose-6-phosphate 1-dehydrogenase	β-D-glucose-6-phosphate + NADP+ = D-glucono-δ-lactone-6-phosphate + NADPH + H+	1.1.1.49		-0.0434167	0	-0.658691	226.763	215.143	124.065	108.872	0.909783	1	1.11115	1	0.396193	0.43961	-6.59206	369.263	908.572	260.015	275.214	2.50405	2.75176	0.403884	0.363404	0.651641	0.695058	-13.4852	362.993	1577.44	134.825	440.855	4.57729	4.95516	0.227681	0.20181	0.0445434	0.0879601	-0.39573	384.604	421.468	173.631	173.989
	6676	6676	META1_1408	zwf3	G6PDH	Glucose-6-phosphate 1-dehydrogenase	β-D-glucose-6-phosphate + NADP+ = D-glucono-δ-lactone-6-phosphate + NADPH + H+	1.1.1.49		0.0553136	0	-0.966726	461.064	538.84	202.824	185.96	1.13599	1	0.880535	1	0.426374	0.371061	-9.16915	512.689	1370.27	366.648	383.183	2.6693	2.34996	0.37467	0.425539	0.610523	0.555209	-16.121	666.041	2720.68	211.431	728.351	4.07888	3.59095	0.245186	0.278478	0.264609	0.209295	-5.71884	587.381	1080.66	246.381	353.092
	6755	6755	META1_0364	zwf4	G6PDH	Glucose-6-phosphate 1-dehydrogenase	β-D-glucose-6-phosphate + NADP+ = D-glucono-δ-lactone-6-phosphate + NADPH + H+	1.1.1.49		-0.0115477	0	-0.112416	1965.32	1912.73	698.171	543.99	0.973774	1	1.02696	1	0.0342247	0.0457723	-0.303687	2036.88	2204.35	1348.09	584.993	1.0821	1.11115	0.924315	0.899969	0.0471431	0.0586908	-0.464359	2580.57	2885.28	687.563	737.185	1.11477	1.1447	0.897223	0.873593	0.00394106	0.0154887	-0.23307	2246.81	2271.03	818.602	658.102
	6067	6067	META1_1866	pgl1	PGL	6-phosphogluconolactonase	D-glucono-δ-lactone-6-phosphate + H2O -> 6-phospho-D-gluconate + H+	3.1.1.31		0.0626254	0	-0.168632	124.57	143.791	91.7343	92.9178	1.15512	1	0.865715	1	-0.0951088	-0.157734	-0.15089	143.945	116.078	120.894	86.0205	0.80501	0.69545	1.24744	1.43792	-0.0146035	-0.0772289	-0.0773706	176.141	170.047	90.356	90.2958	0.967509	0.837088	1.03481	1.19462	-0.103379	-0.166004	-0.584368	160.255	126.277	103.001	88.3506
	397	397	META1_5284	pgl2	PGL	6-phosphogluconolactonase	D-glucono-δ-lactone-6-phosphate + H2O -> 6-phospho-D-gluconate + H+	3.1.1.31		-0.00854732	0	-0.0913504	823.533	807.607	322.967	264.65	0.980511	1	1.01988	1	0.0594228	0.0679701	-0.558537	936.96	1076.69	638.063	314.151	1.14663	1.16942	0.872122	0.855126	0.138687	0.147234	-1.77983	1190.05	1637.65	341.02	459.511	1.37622	1.40357	0.726629	0.712468	0.133954	0.142501	-2.0511	987.703	1344.73	383.827	428.589
	6064	6064	META1_1863	gnd1	6PGDH	6-phosphogluconate dehydrogenase	6-phospho-D-gluconate + NAD(P)+ <=> D-ribulose-5-phosphate + CO2 + NAD(P)H	1.1.1.44		-0.0561811	0	-0.989846	1911.68	1672.32	668.213	472.62	0.878662	1	1.13811	1	-0.00247315	0.0537079	-0.62927	2848	2817.88	1763.3	722.815	0.994415	1.13164	1.00581	0.883674	0.124104	0.180285	-1.79872	2628.64	3502.66	690.2	925.349	1.33079	1.51455	0.751452	0.66026	0.0659678	0.122149	-0.750253	3074.52	3577.19	1103.67	1016.15
	396	396	META1_5283	gnd2	6PGDH	6-phosphogluconate dehydrogenase	6-phospho-D-gluconate + NAD(P)+ <=> D-ribulose-5-phosphate + CO2 + NAD(P)H	1.1.1.44		-0.0335348	0	-0.249254	585.873	542.466	244.108	193.887	0.925689	1	1.08028	1	0.103786	0.137321	-0.79452	528.061	671.342	371.606	217.006	1.26995	1.37189	0.787434	0.728919	0.141346	0.174881	-1.62267	679.043	938.942	217.006	279.668	1.38467	1.49583	0.722194	0.668527	0.114058	0.147593	-1.4519	561.842	731.126	239.01	255.264
	9046	9046	META1_0768	rpe	RPE	Ribulose-phosphate 3-epimerase	D-ribulose-5-phosphate = D-xylulose-5-phosphate	5.1.3.1		0.119318	0	-1.91088	3453.09	4537.6	1239.18	1196.24	1.31619	1	0.759775	1	0.0259483	-0.0933692	-0.53311	4395.66	4653.52	2992.57	1183.22	1.06158	0.806549	0.942008	1.23985	-0.0141002	-0.133418	-0.110374	5412.73	5241.03	1381.39	1338.64	0.968085	0.735499	1.03303	1.35962	0.0462906	-0.073027	-0.537714	4368.05	4847.33	1580.13	1355.28
	2951	2951	META1_2299	rpiA	RPI	Ribose-5-phosphate isomerase	D-ribose-5-phosphate <=> D-ribulose-5-phosphate	5.3.1.6		-0.0721453	0	-0.982368	5718.19	4857.92	2000.81	1282.94	0.846944	1	1.18072	1	-0.509834	-0.437688	-15.5107	6717.82	2071.7	4532.07	557.696	0.309148	0.365016	3.2347	2.73961	-0.498617	-0.426472	-14.9454	8159.64	2578.19	2120.88	698.857	0.317236	0.374566	3.15223	2.66976	-0.281246	-0.209101	-6.91128	6888.49	3603.72	2455.14	1032.08
	12717	12717	META1_1861	tkt1	TKT	transketolase	D-ribose-5-phosphate + D-xylulose-5-phosphate <=> D-sedoheptulose-7-phosphate + D-glyceraldehyde-3-phosphate/D-erythrose-4-phosphate + D-xylulose-5-phosphate = D-fructose-6-phosphate + D-glyceraldehyde-3-phosphate	2.2.1.1		-0.0714099	0	-0.109385	86.6257	73.2685	79.197	73.5728	0.849895	1	1.18082	1	-0.132207	-0.0607967	-0.207129	126.142	93.7456	113.162	79.2497	0.737575	0.869367	1.35587	1.15026	0.0190576	0.0904675	-0.263465	125.057	130.806	79.452	81.105	1.04745	1.23159	0.959442	0.811956	-0.0586279	0.012782	-0.211079	120.138	105.788	89.5647	80.9505
	7891	7891	META1_4949	tkt2	TKT	transketolase	D-ribose-5-phosphate + D-xylulose-5-phosphate <=> D-sedoheptulose-7-phosphate + D-glyceraldehyde-3-phosphate/D-erythrose-4-phosphate + D-xylulose-5-phosphate = D-fructose-6-phosphate + D-glyceraldehyde-3-phosphate	2.2.1.1		-0.0246669	0	-0.670773	6839.7	6368.26	2276.56	1639.65	0.944785	1	1.05844	1	-0.467026	-0.442359	-13.9343	7204.4	2458.85	4507.02	633.638	0.341172	0.361111	2.93107	2.76923	-0.465292	-0.440625	-13.8953	9327.42	3206.69	2380.09	803.019	0.342537	0.362556	2.91939	2.7582	-0.330558	-0.305891	-8.80572	7258.2	3390.28	2533.27	944.268
	12425	12425	META1_2078	tk3A (enzyme is split-Nterm)	TKT	transketolase A	D-ribose-5-phosphate + D-xylulose-5-phosphate <=> D-sedoheptulose-7-phosphate + D-glyceraldehyde-3-phosphate/D-erythrose-4-phosphate + D-xylulose-5-phosphate = D-fructose-6-phosphate + D-glyceraldehyde-3-phosphate	2.2.1.1		0.0577015	0	-0.391208	369.434	421.982	173.073	165	1.14209	1	0.875585	1	0.127592	0.0698905	-1.30171	435.571	588.29	303.807	196.939	1.3415	1.1746	0.745432	0.851353	0.0988497	0.0411482	-0.560983	475.475	599.346	165.74	198.955	1.2556	1.09938	0.796435	0.909603	0.0803078	0.0226063	-0.818762	476.863	574.428	209.573	213.488
	4155	4155	META1_2079	tkt3B (enzyme is split-Cterm)	TKT	transketolase B	D-ribose-5-phosphate + D-xylulose-5-phosphate <=> D-sedoheptulose-7-phosphate + D-glyceraldehyde-3-phosphate/D-erythrose-4-phosphate + D-xylulose-5-phosphate = D-fructose-6-phosphate + D-glyceraldehyde-3-phosphate	2.2.1.1		0.091207	0	-0.620771	303.994	374.322	148.93	151.888	1.23369	1	0.810575	1	0.116229	0.025022	-0.587386	300.562	392.788	226.518	148.906	1.30686	1.05931	0.765193	0.944013	0.13022	0.0390131	-0.850467	415.178	559.591	147.583	186.969	1.34965	1.09399	0.740935	0.914086	0.133098	0.0418915	-1.59211	360.938	491.007	169.833	191.085
	12716	12716	META1_1862	pgi1/tal1	PGI/TAL	6-phosphoglucose isomerase/transaldolase bifunctional enzyme	β-D-glucose-6-phosphate <=> D-fructose-6-phosphate /D-glyceraldehyde-3-phosphate + D-sedoheptulose-7-phosphate = D-fructose-6-phosphate + D-erythrose-4-phosphate (Transaldolase)	5.3.1.9/2.2.1.2		-0.0641861	0	-0.137471	128.273	112.297	92.6672	84.2492	0.863327	1	1.16024	1	-0.0477009	0.0164852	-0.133452	154.482	142.311	122.406	93.1182	0.896861	1.03869	1.11719	0.962753	0.0422897	0.106476	-0.105435	164.362	180.747	87.3078	92.2887	1.10255	1.27784	0.907444	0.782572	-0.027909	0.0362771	-0.0878497	124.766	116.865	91.9193	84.3203
	12234	12234	META1_4950	pgi2/tal2	PGI/TAL	6-phosphoglucose isomerase/transaldolase bifunctional enzyme	β-D-glucose-6-phosphate <=> D-fructose-6-phosphate /D-glyceraldehyde-3-phosphate + D-sedoheptulose-7-phosphate = D-fructose-6-phosphate + D-erythrose-4-phosphate (Transaldolase)	5.3.1.9/2.2.1.2		0.0264213	0	-0.22661	1377.26	1464.14	506.654	427.891	1.06273	1	0.940976	1	0.135969	0.109547	-2.16831	1980.27	2721.93	1311.39	693.531	1.36763	1.28691	0.731192	0.777057	0.250677	0.224256	-5.26929	2005.18	3580.22	544.798	910.021	1.78106	1.67593	0.561465	0.596683	0.119063	0.0926419	-1.8207	1893.74	2502.57	699.975	714.164
[truncated: 79 more columns]
